# Supplementary material for: Massive sequencing of Ulmus minor’s transcriptome provides new molecular tools for a genus under the constant threat of Dutch elm disease
Source: Front Plant Sci. 2015 Jul 20;6:541. doi: 10.3389/fpls.2015.00541 (PMC4507047; doi:10.3389/fpls.2015.00541)
Supplement: Supplementary file 2 [file Table_2.XLSX]

## Sheet: Supplementary Table S2
	Massive sequencing of Ulmus minor's transcriptome provides new molecular
	tools for a genus under the constant threat of Dutch elm disease
	P. Perdiguero (1,2), M. Venturas (1), M.T Cervera (2,3), L. Gil (1,2), C. Collada * (1,2)
1 GENFOR Grupo de Investigación en Genética, Fisiología e Historia Forestal, Universidad Politécnica de Madrid. E-28040 Madrid, Spain.
2 Unidad Mixta de Genómica y Ecofisiología Forestal, INIA/UPM, Madrid, Spain
3 INIA. Centro de Investigación Forestal. Departamento de Ecología y Genética. Carretera de La Coruña km 7,5 28040 Madrid, Spain
Correspondence:
Carmen Collada, GENFOR Grupo de Investigación en Genética, Fisiología e Historia Forestal
Universidad Politécnica de Madrid, Ciudad Universitaria s/n, E-28040, Madrid, Spain.
carmen.collada@upm.es
Supplementary table 2. 181 unique transcripts showing homology with O. novo-ulmi and O. ulmi genomes (Forgetta et al., 2013; Khoshraftar et al., 2013)
or Daldinia eschscholzii genome (Ng et al., 2012). Table shows the best blast hit obtained. Blast results using RefSeq proteins from fungus
or O. novo-ulmi proteins (Comeau et al., 2015) are shown
Blast results using O. novo-ulmi, O. ulmi or Daldinia eschscholzii genomes								Blast results using RefSeq protin database of fungus			Blast results using protein data from O. novo-ulmi (Comeau et al., 2015) and information related with the putative protein when homology were significant
Sequence name	Sequence length	Hit desc.	E-Value	Similarity	Alignment length	Positives	% Coverage	Seq. Description	min. eValue	mean Similarity	Seq. Description	min. eValue	mean Similarity	Chr	Strand	Start	End	Size (nt)	Introns	Size (nt)	Size (aa)	Final Description	(1st BLASTp hit - if blank, see next column)	(1st BLASTp hit - blank are real orphans!)	KO#	Name	Annotation	#GO Terms	GO Terms	Enzyme Code	CAZy	family	SignalP	Splice	SMURF	Notes
GQ979KA02GERI6	142	520NODE_663	4.34432e-08	89	49	44	34.507	60s ribosomal protein l5	6.52435e-10	0.831	OphioH327gp0396	1.06238e-11	0.83	I	+	1525207	1526318	1112	2	200	303	60S ribosomal protein L5 (CPR4)	Togninia minima	Ophiostoma piceae	K02932	RP-L5e, RPL5; large subunit ribosomal protein L5e	60s ribosomal protein l5	4	C:ribosome; F:5S rRNA binding; F:structural constituent of ribosome; P:translation	-			N	Y
GQ979KA02HQBV7	462	33gi|425696297|gb|AMZD01000034.1| Ophiostoma novo-ulmi subsp. novo-ulmi H327 contig00084, whole genome shotgun sequence	1.93152e-25	83	183	153	39.6104	helix-loop-helix dna binding protein	3.17008e-45	0.888	OphioH327gp0714	2.41396e-38	0.89	I	-	2763046	2764005	960	0	0	319	Centromere-binding protein	Grosmannia clavigera	Ophiostoma piceae	K09104	K09104; bHLH factor, other	helix-loop-helix dna binding protein	1	F:protein dimerization activity				N
GSINRSM01B5W9W	396	11234gi|386659005|gb|AIID01010282.1| Daldinia eschscholzii UM1020 De_132140, whole genome shotgun sequence	5.38837e-10	83	97	81	24.4949	dash complex subunit dad4	5.55107e-30	0.941	OphioH327gp0842	1.8728e-29	0.91	I	-	3233418	3234055	638	4	323	104	DASH complex subunit dad4 (Outer kinetochore protein dad4)	Zymoseptoria tritici	Zymoseptoria tritici	K11569	DAD4, HSK2; DASH complex subunit DAD4	dash complex subunit dad4	5	P:regulation of microtubule polymerization or depolymerization; F:microtubule binding; C:DASH complex; P:mitotic spindle organization in nucleus; C:spindle	-			N
GSINRSM02GL7T0	444	11234gi|386659005|gb|AIID01010282.1| Daldinia eschscholzii UM1020 De_132140, whole genome shotgun sequence	1.53684e-10	83	102	85	22.973	dash complex subunit dad4	7.79105e-40	0.964	OphioH327gp0842	6.47218e-39	0.93	I	-	3233418	3234055	638	4	323	104	DASH complex subunit dad4 (Outer kinetochore protein dad4)	Zymoseptoria tritici	Zymoseptoria tritici	K11569	DAD4, HSK2; DASH complex subunit DAD4	dash complex subunit dad4	5	P:regulation of microtubule polymerization or depolymerization; F:microtubule binding; C:DASH complex; P:mitotic spindle organization in nucleus; C:spindle	-			N
GSINRSM01A4BUC	285	660NODE_932	3.80607e-10	85	81	69	28.4211	acyl- desaturase	5.50791e-14	0.952	OphioH327gp2505	2.75305e-13	0.91	II	+	2592343	2593818	1476	1	63	470	Acyl-desaturase	Togninia minima	Ophiostoma piceae	K00507	SCD, desC; stearoyl-CoA desaturase (delta-9 desaturase) [EC:1.14.19.1]	acyl- desaturase	8	P:fatty acid biosynthetic process; P:mycelium development; F:stearoyl-CoA 9-desaturase activity; F:iron ion binding; F:heme binding; C:integral to membrane; C:endoplasmic reticulum; P:oxidation-reduction process	EC:1.14.19.1			N
GSINRSM01EDRJK	530	660NODE_932	2.14549e-22	90	90	81	16.9811	40s ribosomal protein s30	4.63384e-16	0.981	OphioH327gp2800	2.55663e-15	0.68	II	-	3702566	3703622	1057	4	865	63	40S ribosomal protein S30	Chaetomium globosum	Chaetomium globosum	K02983	RP-S30e, RPS30; small subunit ribosomal protein S30e	40s ribosomal protein s30	3	C:ribosome; F:structural constituent of ribosome; P:translation	-			N	Y
GSINRSM02FT2C3	468	878NODE_1768	4.26523e-14	85	96	82	20.5128	er-derived vesicles protein erv14	2.78716e-16	0.997	OphioH327gp3165	5.1424e-17	0.97	II	+	5035983	5036636	654	3	237	138	ER-derived vesicles protein ERV14	Grosmannia clavigera	Ophiostoma piceae			er-derived vesicles protein erv14	6	P:intracellular signal transduction; C:ER to Golgi transport vesicle; P:ascospore formation; P:ER to Golgi vesicle-mediated transport; P:axial cellular bud site selection; C:endoplasmic reticulum membrane	-			N
GQ979KA02FXFUU	305	10229gi|386661006|gb|AIID01009277.1| Daldinia eschscholzii UM1020 De_130130, whole genome shotgun sequence	1.55717e-06	89	47	42	15.4098	manganese resistance protein mnr2	2.79627e-30	0.84	OphioH327gp4756	3.30384e-27	0.73	IV	-	323576	326848	3273	0	0	1090	CorA-like Mg2+ transporter	Colletotrichum higginsianum	Ophiostoma piceae	K16073	ALR, MNR; magnesium transporter	cora-like mg2+ transporter protein	4	P:metal ion transport; C:membrane; F:metal ion transmembrane transporter activity; P:transmembrane transport	-			N
GSINRSM01DTY6E	326	11788gi|386657890|gb|AIID01010836.1| Daldinia eschscholzii UM1020 De_133248, whole genome shotgun sequence	1.03483e-41	83	258	216	79.1411	elongation factor 1 gamma domain-containing protein	3.95133e-35	0.86	OphioH327gp5700	2.3253e-32	0.8	V	-	207777	209618	1842	3	603	412	Elongation factor 1-gamma 1 (elF-1-gamma/Calcium and membrane-binding protein 1)	Myceliophthora thermophila	Ophiostoma piceae	K03233	EEF1G; elongation factor 1-gamma	elongation factor 1-gamma	8	F:translation elongation factor activity; C:eukaryotic translation elongation factor 1 complex; F:calcium ion binding; P:positive regulation of transcription from RNA polymerase II promoter; F:phospholipid binding; P:translational elongation; P:ribosome b	-			N
GSINRSM01DS4VR	450	11788gi|386657890|gb|AIID01010836.1| Daldinia eschscholzii UM1020 De_133248, whole genome shotgun sequence	1.56431e-47	84	264	222	58.6667	elongation factor 1 gamma domain-containing protein	1.74856e-43	0.866	OphioH327gp5700	3.18326e-39	0.8	V	-	207777	209618	1842	3	603	412	Elongation factor 1-gamma 1 (elF-1-gamma/Calcium and membrane-binding protein 1)	Myceliophthora thermophila	Ophiostoma piceae	K03233	EEF1G; elongation factor 1-gamma	elongation factor 1-gamma	8	F:translation elongation factor activity; C:eukaryotic translation elongation factor 1 complex; F:calcium ion binding; P:positive regulation of transcription from RNA polymerase II promoter; F:phospholipid binding; P:translational elongation; P:ribosome b	-			N
GRJUUT102DVY9B	352	120gi|425696210|gb|AMZD01000121.1| Ophiostoma novo-ulmi subsp. novo-ulmi H327 contig01370, whole genome shotgun sequence	8.3174e-18	82	170	140	48.2955	alcohol oxidase	8.85696e-43	0.881	OphioH327gp5955	2.70586e-34	0.8	V	+	1164316	1166821	2506	6	505	666	Alcohol oxidase (Methanol oxidase)	Grosmannia clavigera	Ophiostoma piceae			alcohol oxidase	4	F:flavin adenine dinucleotide binding; P:oxidation-reduction process; P:alcohol metabolic process; F:choline dehydrogenase activity	EC:1.1.99.1			N
GQ979KA02F02BT	181	562NODE_744	3.51641e-06	90	42	38	23.2044	60s ribosomal protein l36	6.81678e-12	0.774	OphioH327gp5996	4.36819e-11	0.7	V	-	1324796	1325728	933	1	618	104	60S ribosomal protein L36	Grosmannia clavigera	Ophiostoma piceae	K02920	RP-L36e, RPL36; large subunit ribosomal protein L36e	60s ribosomal protein l36	3	C:ribosome; F:structural constituent of ribosome; P:translation	-			N
GSINRSM01COFO5	303	4172gi|386673116|gb|AIID01003220.1| Daldinia eschscholzii UM1020 De_118014, whole genome shotgun sequence	1.60531e-09	93	44	41	14.5215	mapeg family protein	7.53119e-17	0.668	OphioH327gp6065	1.27478e-11	0.59	V	-	1606290	1607040	751	3	301	149	Microsomal glutathione S-transferase	Grosmannia clavigera	Ophiostoma piceae	K00799	GST, gst; glutathione S-transferase [EC:2.5.1.18]	mapeg family protein	1	F:transferase activity				N
GSINRSM02IF96C	312	661NODE_933	1.06063e-10	88	62	55	19.8718	mitochondrial peroxiredoxin prx1	1.19769e-17	0.9289	OphioH327gp6965	5.46977e-13	0.85	VI	+	1968417	1969157	741	1	66	224	Mitochondrial peroxiredoxin PRX1	Colletotrichum graminicola	Ophiostoma piceae	K03386	E1.11.1.15, PRDX, ahpC; peroxiredoxin (alkyl hydroperoxide reductase subunit C) [EC:1.11.1.15]	mitochondrial peroxiredoxin prx1	3	P:oxidation-reduction process; F:antioxidant activity; F:peroxiredoxin activity	EC:1.11.1.15			N
GQ979KA02FIF8A	381	8393gi|386664677|gb|AIID01007441.1| Daldinia eschscholzii UM1020 De_126456, whole genome shotgun sequence	3.44062e-14	86	88	76	23.0971	60s ribosomal protein l29	2.02124e-16	0.944	OphioH327gp7471	1.24394e-18	0.94	VII	-	996619	997189	571	3	373	65	60S ribosomal protein L29 (YL43)	Neurospora crassa	Sporothrix schenckii	K02905	RP-L29e, RPL29; large subunit ribosomal protein L29e	60s ribosomal protein l29	5	C:ribosome; F:structural constituent of ribosome; P:transport; C:integral to membrane; P:translation	-			N
GQ979KA02F99PR	427	8393gi|386664677|gb|AIID01007441.1| Daldinia eschscholzii UM1020 De_126456, whole genome shotgun sequence	3.87662e-14	86	88	76	20.6089	60s ribosomal protein l29	2.75445e-26	0.95	OphioH327gp7471	1.51992e-25	0.9
GSINRSM02IFLS3	476	520NODE_663	2.67818e-12	85	85	73	17.8571	upf0591 membrane protein	2.92646e-58	0.938	OphioH327gp7848.1	2.67939e-45	0.82	VII	+	2429808	2430495	688	2	238	149	DUF1761 domain-containing protein	Grosmannia clavigera	Ophiostoma piceae				0	-				N
GSINRSM01DMHDK	369	10917gi|386659633|gb|AIID01009965.1| Daldinia eschscholzii UM1020 De_131506, whole genome shotgun sequence	9.42037e-24	91	84	77	22.7642	glucose-repressible protein	4.97863e-37	0.835	OphioH327gp8157	1.06859e-14	0.62	VIII	+	843923	844191	269	1	53	71	Glucose-repressible gene protein	Podospora anserina	Ophiostoma piceae			glucose-repressible protein grg-1	0	-				N
GSINRSM01CKLG2	434	10917gi|386659633|gb|AIID01009965.1| Daldinia eschscholzii UM1020 De_131506, whole genome shotgun sequence	1.11649e-23	91	84	77	19.3548	glucose-repressible protein	2.72676e-39	0.845	OphioH327gp8157	3.11999e-16	0.63	VIII	+	843923	844191	269	1	53	71	Glucose-repressible gene protein	Podospora anserina	Ophiostoma piceae			glucose-repressible protein grg-1	0	-				N
GSINRSM02H0GWD	435	10917gi|386659633|gb|AIID01009965.1| Daldinia eschscholzii UM1020 De_131506, whole genome shotgun sequence	1.11917e-23	91	84	77	19.3103	glucose-repressible protein	2.13377e-38	0.845	OphioH327gp8157	4.03314e-17	0.64	VIII	+	843923	844191	269	1	53	71	Glucose-repressible gene protein	Podospora anserina	Ophiostoma piceae			glucose-repressible protein grg-1	0	-				N
GSINRSM01D9XS5	308	166NODE_6	5.17515e-28	89	119	106	38.6364	chk1 checkpoint-like partial	8.87577e-17	0.8067	No hits found
GSINRSM01DX6KS	244	166NODE_6	2.49948e-26	92	88	81	36.0656	chk1 checkpoint-like partial	4.50346e-20	0.7467	No hits found
GSINRSM01CXUQK	207	166NODE_6	7.96278e-23	94	70	66	33.8164	chk1 checkpoint-like partial	1.37916e-16	0.7733	No hits found
GSINRSM01BV71N	350	166NODE_6	1.39122e-22	89	98	88	28	chk1 checkpoint-like partial	4.30605e-10	0.686	No hits found
GSINRSM01BVC1V	354	166NODE_6	2.36926e-27	90	98	89	27.6836	chk1 checkpoint-like partial	4.48903e-18	0.77	No hits found
isotig08113	327	166NODE_6	3.53173e-29	93	89	83	27.2171	chk1 checkpoint-like partial	4.9459e-19	0.8	No hits found
isotig07983	256	166NODE_6	6.63129e-27	97	69	67	26.9531	chk1 checkpoint-like partial	1.75239e-15	0.8067	No hits found
GQ979KA02J3NX9	333	166NODE_6	1.27147e-19	88	89	79	26.7267	chk1 checkpoint-like partial	6.54055e-13	0.8033	No hits found
isotig08112	352	166NODE_6	3.81747e-29	93	89	83	25.2841	chk1 checkpoint-like partial	6.33221e-19	0.8	No hits found
GSINRSM02H35SC	381	166NODE_6	5.78964e-19	88	96	85	25.1969	chk1 checkpoint-like partial	2.43267e-14	0.7283	No hits found
isotig08114	349	166NODE_6	5.90681e-28	93	87	81	24.9284	chk1 checkpoint-like partial	3.51599e-18	0.8	No hits found
GSINRSM01BEOD0	366	166NODE_6	1.57165e-28	93	88	82	24.0437	chk1 checkpoint-like partial	3.1926e-19	0.7467	No hits found
GSINRSM02IZTXL	396	166NODE_6	7.00288e-31	94	88	83	22.2222	chk1 checkpoint-like partial	1.19719e-12	0.76	No hits found
isotig18373	442	166NODE_6	2.77408e-21	88	96	85	21.7195	chk1 checkpoint-like partial	1.37794e-10	0.72	No hits found
GRJUUT102DGXFY	164	166NODE_6	2.34486e-19	84	128	108	78.0488	hypothetical protein AOR_1_208044	3.21654e-17	0.8167	No hits found
GSINRSM02F0VJD	402	166NODE_6	9.24559e-52	94	134	126	33.3333	hypothetical protein COCCADRAFT_113570	1.52195e-15	0.81	No hits found
GSINRSM02I8ARV	253	166NODE_6	3.36459e-10	97	37	36	14.6245	hypothetical protein DICSQDRAFT_150876	2.57928e-11	0.65	No hits found
GSINRSM02FZ76D	219	546NODE_715	1.18135e-12	87	73	64	33.3333	hypothetical protein FGSG_12754	9.77558e-08	0.81	No hits found
GSINRSM02IN9B9	284	546NODE_715	1.55545e-12	87	73	64	25.7042	hypothetical protein FGSG_12754	3.89971e-07	0.75	No hits found
GSINRSM02I7A5L	411	546NODE_715	2.29809e-12	87	73	64	17.7616	hypothetical protein FGSG_12754	2.26833e-07	0.8067	No hits found
GSINRSM01ARQTD	438	546NODE_715	2.45597e-12	87	73	64	16.6667	hypothetical protein FGSG_12754	7.88875e-07	0.8067	No hits found
GSINRSM02GKA58	263	166NODE_6	2.59822e-23	86	159	137	60.4563	hypothetical protein GLOTRDRAFT_50878, partial	9.27001e-08	0.6133	No hits found
GSINRSM01EX1G4	350	166NODE_6	2.52308e-33	90	116	105	33.1429	hypothetical protein GLOTRDRAFT_50878, partial	2.70631e-12	0.83	No hits found
GQ979KA02IR67F	406	708NODE_1017	2.10516e-06	90	51	46	12.5616	hypothetical protein H072_7056	7.71323e-06	0.7	No hits found
GSINRSM02ISXSB	321	166NODE_6	6.04988e-37	96	102	98	31.7757	hypothetical protein MBM_10038	5.84051e-10	0.7	No hits found
GSINRSM01ECP9U	399	166NODE_6	1.59655e-22	90	86	78	21.5539	hypothetical protein MELLADRAFT_84525	1.3188e-07	0.42	No hits found
isotig20782	450	166NODE_6	2.43331e-09	80	180	144	40	hypothetical protein MELLADRAFT_90079	1.17248e-13	0.67	No hits found
GSINRSM01AESH9	172	166NODE_6	3.45023e-09	94	39	37	22.6744	hypothetical protein MELLADRAFT_90079	1.20191e-09	0.83	No hits found
GRJUUT102ER37A	290	546NODE_715	1.59053e-12	87	73	64	25.1724	hypothetical protein MYCTH_2133976, partial	7.60802e-06	0.86	No hits found
GSINRSM02JRMJG	363	546NODE_715	2.0174e-12	87	73	64	20.1102	hypothetical protein MYCTH_2133976, partial	1.21201e-06	0.83	No hits found
GQ979KA02GXRFN	390	546NODE_715	2.17529e-12	87	73	64	18.7179	hypothetical protein MYCTH_2133976, partial	1.08388e-06	0.835	No hits found
GSINRSM01DXQ7E	442	546NODE_715	2.47936e-12	87	73	64	16.5158	hypothetical protein MYCTH_2133976, partial	2.48073e-07	0.73	No hits found
GSINRSM02H6N40	449	546NODE_715	2.52029e-12	87	73	64	16.2584	hypothetical protein MYCTH_2133976, partial	2.43938e-07	0.73	No hits found
GQ979KA02JN2SF	407	166NODE_6	5.75672e-13	85	106	91	26.0442	hypothetical protein TRAVEDRAFT_137643, partial	7.63608e-06	0.7	No hits found
GRJUUT102DCXRD	188	166NODE_6	2.72769e-19	85	128	109	68.0851	hypothetical protein TSTA_040370	1.27108e-06	0.69	No hits found
GSINRSM02GTITP	399	9790gi|386661885|gb|AIID01008838.1| Daldinia eschscholzii UM1020 De_129250, whole genome shotgun sequence	5.65943e-50	84	276	233	69.1729	pq loop repeat protein	8.68239e-13	0.87	No hits found
GRJUUT101CH7XG	100	166NODE_6	1.32397e-19	95	64	61	64	No hits found			No hits found
GRJUUT102C5CEP	115	166NODE_6	1.74906e-28	97	71	69	61.7391	No hits found			No hits found
GRJUUT101A8UER	103	166NODE_6	1.37182e-19	96	56	54	54.3689	No hits found			No hits found
GRJUUT101A8Y0B	130	166NODE_6	2.7109e-15	94	57	54	43.8462	No hits found			No hits found
GRJUUT101ASY5G	103	166NODE_6	5.02952e-13	95	45	43	43.6893	No hits found			No hits found
GSINRSM02HO9IT	108	166NODE_6	5.73573e-19	100	47	47	43.5185	No hits found			No hits found
GRJUUT102DTRTI	101	166NODE_6	7.67014e-12	97	39	38	38.6139	No hits found			No hits found
GSINRSM02H47JJ	113	166NODE_6	8.76587e-12	95	43	41	38.0531	No hits found			No hits found
GSINRSM01CMP87	332	166NODE_6	2.29859e-30	90	115	104	34.6386	No hits found			No hits found
GSINRSM01D295Z	332	166NODE_6	2.29859e-30	90	115	104	34.6386	No hits found			No hits found
GSINRSM01BP5HS	333	166NODE_6	2.30591e-30	90	115	104	34.5345	No hits found			No hits found
GSINRSM01C1QWU	333	166NODE_6	2.30591e-30	90	115	104	34.5345	No hits found			No hits found
GSINRSM01E0QUZ	333	166NODE_6	2.30591e-30	90	115	104	34.5345	No hits found			No hits found
GSINRSM01A808H	334	166NODE_6	2.31323e-30	90	115	104	34.4311	No hits found			No hits found
GSINRSM02H02ZP	180	161NODE_1	8.84496e-07	88	54	48	30	No hits found			No hits found
GRJUUT101BKKQB	275	166NODE_6	1.03736e-19	93	65	61	23.6364	No hits found			No hits found
GSINRSM02H3JMV	241	10938gi|386659590|gb|AIID01009986.1| Daldinia eschscholzii UM1020 De_131548, whole genome shotgun sequence	1.31001e-12	95	45	43	18.6722	No hits found			No hits found
GRJUUT101B7XLT	375	198NODE_71	5.28316e-13	88	70	62	18.6667	No hits found			No hits found
GSINRSM02H3V2B	375	198NODE_71	5.28316e-13	88	70	62	18.6667	No hits found			No hits found
GRJUUT101CIPKR	334	11975gi|386657520|gb|AIID01011023.1| Daldinia eschscholzii UM1020 De_133622, whole genome shotgun sequence	4.50456e-10	97	37	36	11.0778	No hits found			No hits found
isotig21366	421	166NODE_6	1.45386e-10	97	38	37	9.02613	No hits found			No hits found
GSINRSM02I67DC	413	8824gi|386663816|gb|AIID01007872.1| Daldinia eschscholzii UM1020 De_127318, whole genome shotgun sequence	1.29278e-149	95	342	328	82.8087	No hits found			No hits found
GQ979KA02FSGY7	368	161NODE_1	2.46798e-27	83	174	146	47.2826	No hits found			No hits found
GRJUUT102C16ID	145	10511gi|386660442|gb|AIID01009559.1| Daldinia eschscholzii UM1020 De_130694, whole genome shotgun sequence	2.95792e-12	84	104	88	71.7241	No hits found			No hits found
GRJUUT102D0UM3	136	555NODE_733	1.17109e-17	87	93	81	68.3824	No hits found			No hits found
GRJUUT102C76TZ	102	166NODE_6	3.18384e-14	89	67	60	65.6863	No hits found			No hits found
GQ979KA02FZFE4	111	166NODE_6	8.26784e-09	87	62	54	55.8559	No hits found			No hits found
GRJUUT101BYLU2	202	166NODE_6	3.06359e-22	88	109	97	53.9604	No hits found			No hits found
GSINRSM02I7YU3	100	10662gi|386660141|gb|AIID01009710.1| Daldinia eschscholzii UM1020 De_130996, whole genome shotgun sequence	7.03205e-06	88	53	47	53	No hits found			No hits found
GQ979KA02GRL47	114	166NODE_6	3.77193e-17	95	60	57	52.6316	No hits found			No hits found
GSINRSM02IK89S	121	647NODE_914	9.49636e-12	89	59	53	48.7603	No hits found			No hits found
GSINRSM01COGJA	111	660NODE_932	3.26693e-08	88	53	47	47.7477	No hits found			No hits found
GQ979KA02H9V6G	162	166NODE_6	2.31296e-19	92	76	70	46.9136	No hits found			No hits found
GSINRSM01CBSAH	103	166NODE_6	7.28623e-06	88	45	40	43.6893	No hits found			No hits found
GSINRSM01D68PK	101	14gi|425696316|gb|AMZD01000015.1| Ophiostoma novo-ulmi subsp. novo-ulmi H327 contig00025, whole genome shotgun sequence	1.94113e-12	95	44	42	43.5644	No hits found			No hits found
GSINRSM01CKZI6	106	166NODE_6	2.05668e-12	95	44	42	41.5094	No hits found			No hits found
GRJUUT102D0818	103	5865gi|386669736|gb|AIID01004913.1| Daldinia eschscholzii UM1020 De_121400, whole genome shotgun sequence	1.84397e-06	90	42	38	40.7767	No hits found			No hits found
GSINRSM02GD7GX	130	166NODE_6	2.7109e-15	94	53	50	40.7692	No hits found			No hits found
GRJUUT102EIRVI	145	166NODE_6	1.96675e-16	94	59	56	40.6897	No hits found			No hits found
GRPFBJX02F9XOB	106	166NODE_6	4.82945e-07	93	43	40	40.566	No hits found			No hits found
GSINRSM02GO8F8	131	166NODE_6	2.73489e-15	94	53	50	40.458	No hits found			No hits found
GQ979KA02FLY61	106	166NODE_6	7.82806e-09	92	42	39	39.6226	No hits found			No hits found
GSINRSM02HW5YZ	145	166NODE_6	4.97739e-17	94	56	53	38.6207	No hits found			No hits found
GRJUUT101AYVO5	115	166NODE_6	1.34582e-07	93	44	41	38.2609	No hits found			No hits found
GQ979KA02GTQIL	110	166NODE_6	3.35548e-11	95	42	40	38.1818	No hits found			No hits found
GSINRSM01EUE8K	133	166NODE_6	4.18533e-11	92	50	46	37.594	No hits found			No hits found
GQ979KA02JIIBD	101	166NODE_6	7.11678e-06	91	37	34	36.6337	No hits found			No hits found
GRJUUT101BGLSS	109	166NODE_6	4.99225e-07	92	39	36	35.7798	No hits found			No hits found
GSINRSM01ADZJ4	124	166NODE_6	2.47263e-12	95	44	42	35.4839	No hits found			No hits found
GQ979KA02HB5C5	516	801NODE_1392	3.929e-36	87	181	158	35.0775	No hits found			No hits found
GSINRSM01EMC5B	334	166NODE_6	3.47901e-26	89	116	104	34.7305	No hits found			No hits found
GRJUUT101CIDB0	107	166NODE_6	1.23595e-07	94	36	34	33.6449	No hits found			No hits found
GRJUUT101BSFDD	171	181NODE_44	8.67538e-10	91	56	51	32.7485	No hits found			No hits found
GQ979KA02I882L	118	116gi|425696214|gb|AMZD01000117.1| Ophiostoma novo-ulmi subsp. novo-ulmi H327 contig01366, whole genome shotgun sequence	5.48062e-07	94	38	36	32.2034	No hits found			No hits found
GSINRSM01EPEL8	117	166NODE_6	8.47236e-06	91	37	34	31.6239	No hits found			No hits found
GRJUUT102D3XIF	120	166NODE_6	8.72653e-06	91	37	34	30.8333	No hits found			No hits found
GSINRSM02HJ0JB	121	166NODE_6	8.81125e-06	91	37	34	30.5785	No hits found			No hits found
GSINRSM01AD2K9	116	166NODE_6	5.37209e-07	94	35	33	30.1724	No hits found			No hits found
GRJUUT101BK9OI	126	166NODE_6	9.23487e-06	91	37	34	29.3651	No hits found			No hits found
GRJUUT101ARVR3	285	166NODE_6	9.99974e-14	89	83	74	29.1228	No hits found			No hits found
GQ979KA02GUEV2	182	166NODE_6	2.26592e-07	88	52	46	28.5714	No hits found			No hits found
GRJUUT102D4PVP	271	661NODE_933	5.84578e-12	86	75	65	27.6753	No hits found			No hits found
GQ979KA02FYAXC	410	166NODE_6	1.58228e-19	86	113	98	27.561	No hits found			No hits found
GQ979KA02FQVX3	175	12267gi|386657064|gb|AIID01011315.1| Daldinia eschscholzii UM1020 De_134206, whole genome shotgun sequence	8.57364e-07	89	47	42	26.8571	No hits found			No hits found
GQ979KA02H5LPP	211	166NODE_6	4.48309e-12	91	56	51	26.5403	No hits found			No hits found
GRPFBJX02IL9IV	236	166NODE_6	1.28077e-12	90	61	55	25.8475	No hits found			No hits found
GSINRSM02HNMJU	254	166NODE_6	5.661e-15	90	65	59	25.5906	No hits found			No hits found
GRJUUT102D9VRO	430	166NODE_6	1.66301e-19	88	105	93	24.4186	No hits found			No hits found
GSINRSM02JP2LA	166	166NODE_6	3.4432e-12	97	40	39	24.0964	No hits found			No hits found
GQ979KA02JY6UJ	448	166NODE_6	1.0708e-17	86	106	92	23.6607	No hits found			No hits found
GQ979KA02GV8UQ	190	166NODE_6	2.37578e-07	90	44	40	23.1579	No hits found			No hits found
GQ979KA02GZ1I9	206	12267gi|386657064|gb|AIID01011315.1| Daldinia eschscholzii UM1020 De_134206, whole genome shotgun sequence	1.02558e-06	89	47	42	22.8155	No hits found			No hits found
GRJUUT101BSIKD	212	166NODE_6	1.05814e-06	89	47	42	22.1698	No hits found			No hits found
GSINRSM01CN88P	243	473NODE_578	1.27314e-09	90	52	47	21.3992	No hits found			No hits found
GQ979KA02JZ8HU	321	166NODE_6	4.16053e-07	86	68	59	21.1838	No hits found			No hits found
GQ979KA02GLJ2J	260	181NODE_44	5.38613e-09	89	55	49	21.1538	No hits found			No hits found
GSINRSM01BUBC6	308	708NODE_1017	4.29164e-13	90	62	56	20.1299	No hits found			No hits found
GSINRSM01D49Q8	232	11054gi|386659358|gb|AIID01010102.1| Daldinia eschscholzii UM1020 De_131780, whole genome shotgun sequence	3.0652e-10	93	45	42	19.3966	No hits found			No hits found
GSINRSM01E5MB2	187	166NODE_6	2.33458e-07	94	36	34	19.2513	No hits found			No hits found
GSINRSM02INWEV	358	12267gi|386657064|gb|AIID01011315.1| Daldinia eschscholzii UM1020 De_134206, whole genome shotgun sequence	1.84473e-06	85	67	57	18.7151	No hits found			No hits found
GRPFBJX02GO9G7	327	166NODE_6	1.80689e-12	90	61	55	18.6544	No hits found			No hits found
GQ979KA02J1Q7W	332	10638gi|386660189|gb|AIID01009686.1| Daldinia eschscholzii UM1020 De_130948, whole genome shotgun sequence	1.70366e-06	86	59	51	17.7711	No hits found			No hits found
isotig15210	378	660NODE_932	7.71799e-06	84	66	56	17.4603	No hits found			No hits found
GQ979KA02HEJJB	433	546NODE_715	3.64971e-08	86	74	64	17.0901	No hits found			No hits found
GSINRSM02IXZGH	249	661NODE_933	4.97444e-06	90	42	38	16.8675	No hits found			No hits found
GQ979KA02GUNFY	427	166NODE_6	3.87662e-14	88	72	64	16.8618	No hits found			No hits found
GSINRSM01AZT8V	380	166NODE_6	5.77369e-19	93	64	60	16.8421	No hits found			No hits found
GRJUUT101APIFY	425	12267gi|386657064|gb|AIID01011315.1| Daldinia eschscholzii UM1020 De_134206, whole genome shotgun sequence	2.20825e-06	85	67	57	15.7647	No hits found			No hits found
GQ979KA02IE6QU	333	166NODE_6	1.91225e-15	96	50	48	15.015	No hits found			No hits found
GQ979KA02IMXCT	436	166NODE_6	1.00267e-14	90	65	59	14.9083	No hits found			No hits found
GRJUUT101AX4GW	430	546NODE_715	1.54303e-13	90	63	57	14.6512	No hits found			No hits found
GSINRSM02IZB9L	341	166NODE_6	4.60435e-10	91	49	45	14.3695	No hits found			No hits found
GSINRSM01B1DVV	362	440NODE_502	5.09078e-13	94	50	47	13.8122	No hits found			No hits found
GQ979KA02IYMLU	395	166NODE_6	3.31552e-08	88	54	48	13.6709	No hits found			No hits found
contig07876	504	10241gi|386660982|gb|AIID01009289.1| Daldinia eschscholzii UM1020 De_130154, whole genome shotgun sequence	6.67332e-07	85	68	58	13.4921	No hits found			No hits found
GSINRSM01BN23K	377	440NODE_502	5.31276e-13	94	50	47	13.2626	No hits found			No hits found
GSINRSM01B6OXW	421	166NODE_6	3.54417e-08	88	54	48	12.8266	No hits found			No hits found
GSINRSM01DV40D	393	440NODE_502	5.54954e-13	94	50	47	12.7226	No hits found			No hits found
GSINRSM01B0U98	397	440NODE_502	5.60873e-13	94	50	47	12.5945	No hits found			No hits found
GSINRSM01B47C8	377	5865gi|386669736|gb|AIID01004913.1| Daldinia eschscholzii UM1020 De_121400, whole genome shotgun sequence	3.27766e-11	93	47	44	12.4668	No hits found			No hits found
GSINRSM01D1H6R	403	440NODE_502	5.69753e-13	94	50	47	12.4069	No hits found			No hits found
GSINRSM02J3O8V	338	72gi|425696258|gb|AMZD01000073.1| Ophiostoma novo-ulmi subsp. novo-ulmi H327 contig00525, whole genome shotgun sequence	1.11201e-07	92	41	38	12.1302	No hits found			No hits found
GQ979KA02JFW6U	404	166NODE_6	1.34136e-07	89	49	44	12.1287	No hits found			No hits found
GSINRSM01CYCER	430	166NODE_6	5.65722e-07	88	52	46	12.093	No hits found			No hits found
GSINRSM02ISAGU	409	166NODE_6	1.35873e-07	89	49	44	11.9804	No hits found			No hits found
GSINRSM01DBUVF	381	660NODE_932	1.26143e-07	93	45	42	11.811	No hits found			No hits found
GSINRSM01A1OHD	342	95gi|425696235|gb|AMZD01000096.1| Ophiostoma novo-ulmi subsp. novo-ulmi H327 contig01197, whole genome shotgun sequence	1.75792e-06	92	39	36	11.4035	No hits found			No hits found
GRJUUT101BI9O3	395	166NODE_6	5.17663e-07	90	44	40	11.1392	No hits found			No hits found
GSINRSM01D5F4O	407	166NODE_6	5.3414e-07	90	44	40	10.8108	No hits found			No hits found
GQ979KA02I6EP2	422	166NODE_6	5.54737e-07	90	44	40	10.4265	No hits found			No hits found
GSINRSM01D59I9	363	161NODE_1	1.87186e-06	94	35	33	9.64187	No hits found			No hits found
GSINRSM01DVEVT	418	161NODE_1	1.39001e-07	94	37	35	8.85167	No hits found			No hits found
isotig10041	514	160gi|425696170|gb|AMZD01000161.1| Ophiostoma novo-ulmi subsp. novo-ulmi H327 contig00013 mitochondrial, whole genome shotgun sequence	2.69114e-06	93	43	40	8.36576	No hits found			No hits found
GQ979KA02IBBQY	421	12032gi|386657405|gb|AIID01011080.1| Daldinia eschscholzii UM1020 De_133736, whole genome shotgun sequence	2.18655e-06	94	35	33	8.31354	No hits found			No hits found
isotig04795	942	712NODE_1025	5.00727e-06	94	35	33	3.7155	No hits found			No hits found
isotig04796	942	712NODE_1025	5.00727e-06	94	35	33	3.7155	No hits found			No hits found
isotig04794	945	712NODE_1025	5.02355e-06	94	35	33	3.7037	No hits found			No hits found
GQ979KA02IMT9J	372	161NODE_1	2.7929e-36	85	220	187	59.1398	No hits found			No hits found
GRJUUT102D4MFJ	200	166NODE_6	3.53323e-71	96	167	161	83.5	No hits found			No hits found
GRJUUT102E09MQ	123	166NODE_6	1.82232e-25	100	58	58	47.1545	No hits found			No hits found
GSINRSM01C4FJ6	197	166NODE_6	3.21256e-28	100	63	63	31.9797	No hits found			No hits found
GRJUUT102DVMGH	341	12289gi|386657042|gb|AIID01011337.1| Daldinia eschscholzii UM1020 De_134250, whole genome shotgun sequence	5.15167e-19	90	100	90	29.3255	No hits found			No hits found
GRJUUT101BEGDD	133	166NODE_6	6.784e-13	100	37	37	27.8195	No hits found			No hits found
GRJUUT102DTU5J	253	166NODE_6	2.3225e-17	96	53	51	20.9486	No hits found			No hits found
isotig17285	496	546NODE_715	1.23575e-20	92	75	69	15.121	No hits found			No hits found
